# Supplementary material for: Wnt5a and CCL25 promote adult T-cell acute lymphoblastic leukemia cell migration, invasion and metastasis
Source: PubMed Central journal article supplement (PMC5503593; doi:10.18632/oncotarget.16559), 2017-03-25
Supplement: oncotarget-08-39033-s001.pdf [file oncotarget-08-39033-s001.pdf]

## Wnt5a and CCL25 promote adult T-cell acute lymphoblastic leukemia cell migration, invasion and metastasis

### SUPPLEMENTARY MATERIALS

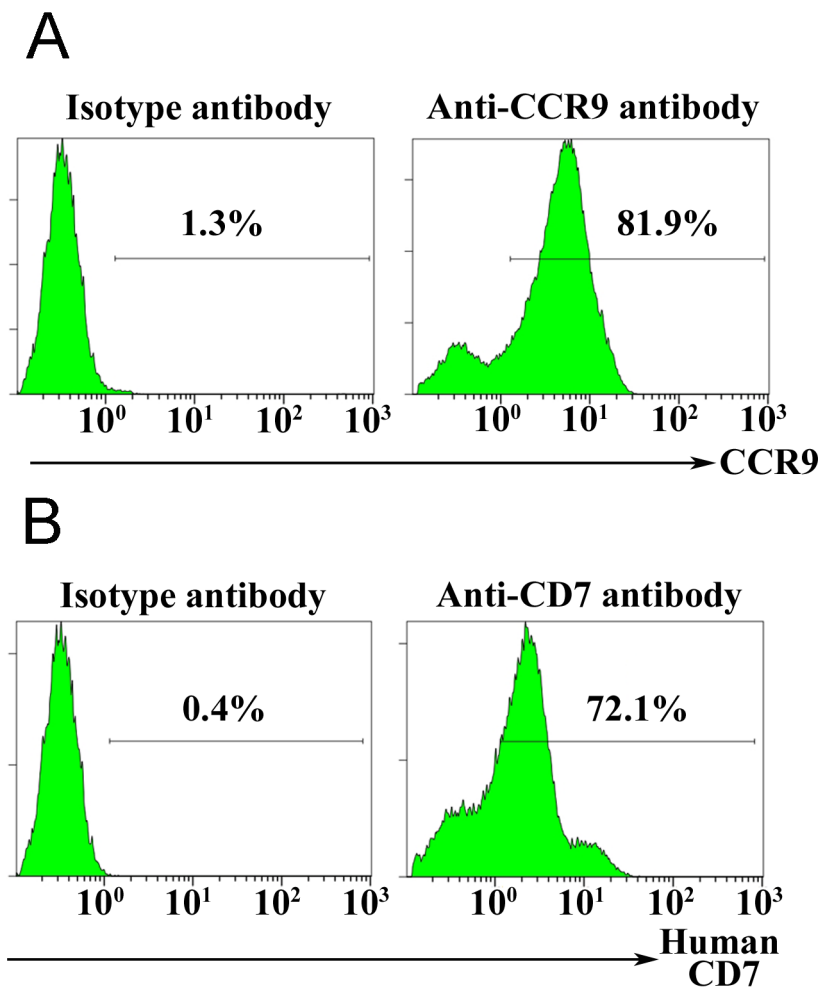

**Supplementary Figure 1: Flow cytometry analyze the expression of CCR9 and CD7 in MOLT4 cells.** MOLT4 cells were incubated with anti-human CD7 (Abclonal, USA) or FITC-labeled anti human CCR9 antibody (R&D Systems, Abingdon, United Kingdom) or matched isotype antibody (DAKO) in PBS containing 3% BSA and 0.1% sodium azide for 30 minutes, followed by washing three times with PBS, Dylight488-conjugated anti rabbit IgG antibody was followed for detecting CD7, after washing three times with PBS, cells finally resuspended in 300  $\mu$ l PBS for flow cytometric analysis (Beckman, USA).

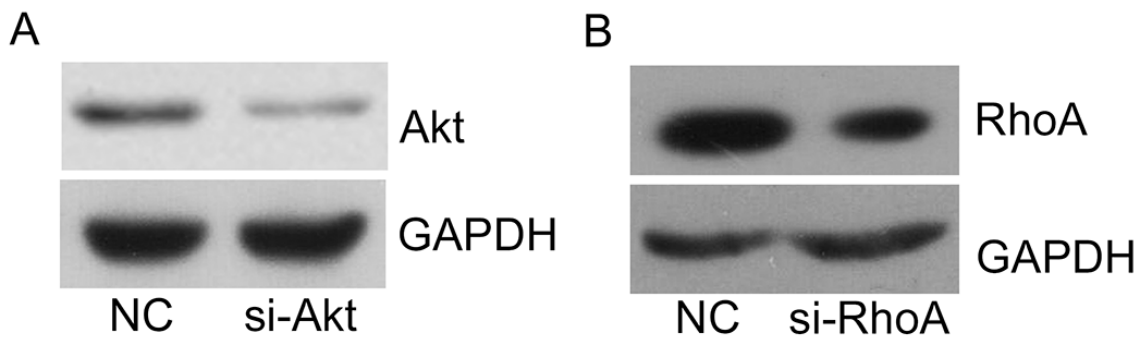

**Supplementary Figure 2: Western blotting confirmed Akt and RhoA knockdown via siRNA in MOLT4 cells.** MOLT4 cells transfected with Akt siRNA, RhoA siRNA, or scramble (NC) siRNA for 72 h, and Western blotting was used to confirm Akt (A) and RhoA (B) interference rate.

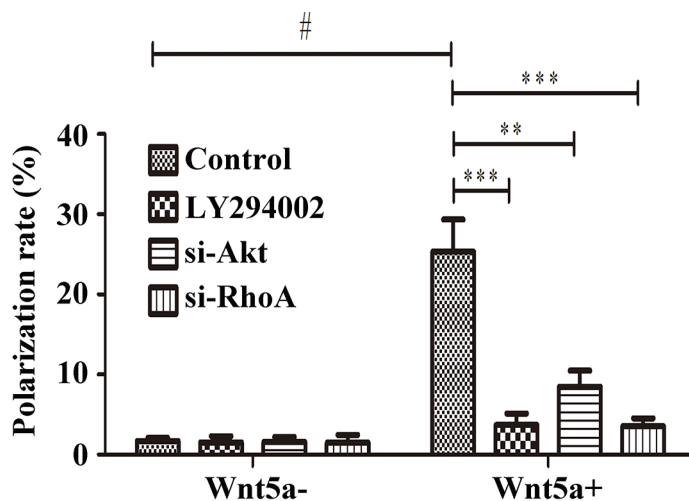

**Supplementary Figure 3: The statistical figure of polarization ratio in MOLT4 cells.** MOLT4 cells transfected with Akt siRNA, RhoA siRNA, or scramble (NC) siRNA for 72 h, or pretreated with 20  $\mu$ M LY294002 for 2 h, were treated with 500 ng/ml Wnt5a for 3 h, and cell polarization was analyzed by LSCM.

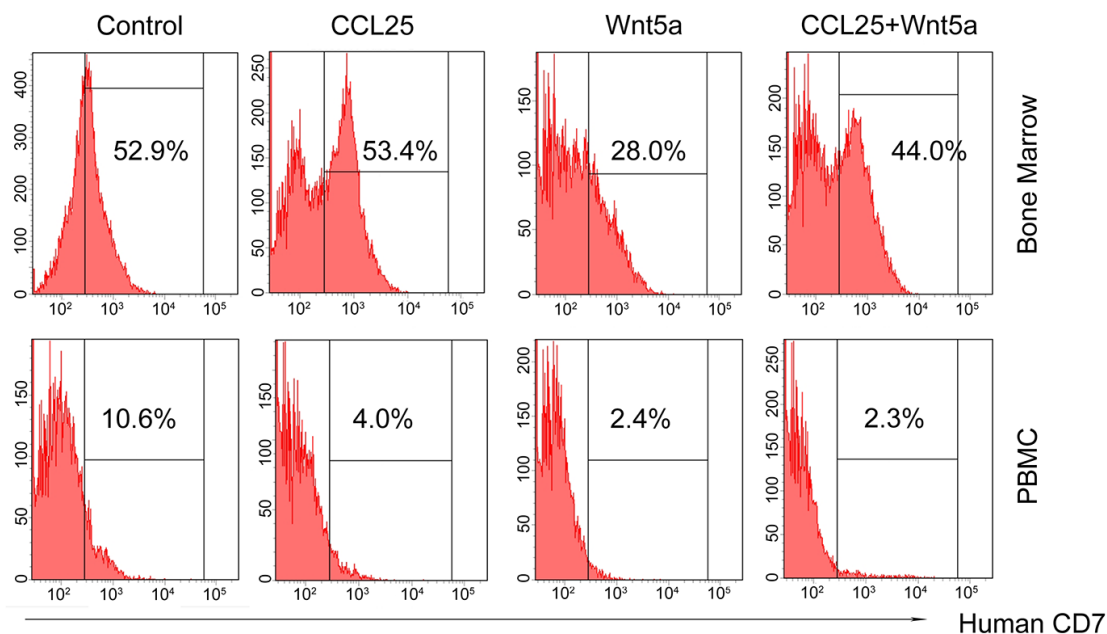

**Supplementary Figure 4: MOLT4 cell ratio in bone marrow and PBMC.** Leukocytes from the peripheral blood and bone marrow of different groups were separated by density gradient centrifugation using Ficoll-Paque Plus (GE Healthcare, Uppsala, Sweden) according to the manufacturer’s instructions. Then, we detected the cell ratio of CD7 (the molecule marker of MOLT4 cells) by flow cytometry, just as Supplementary Figure 1.

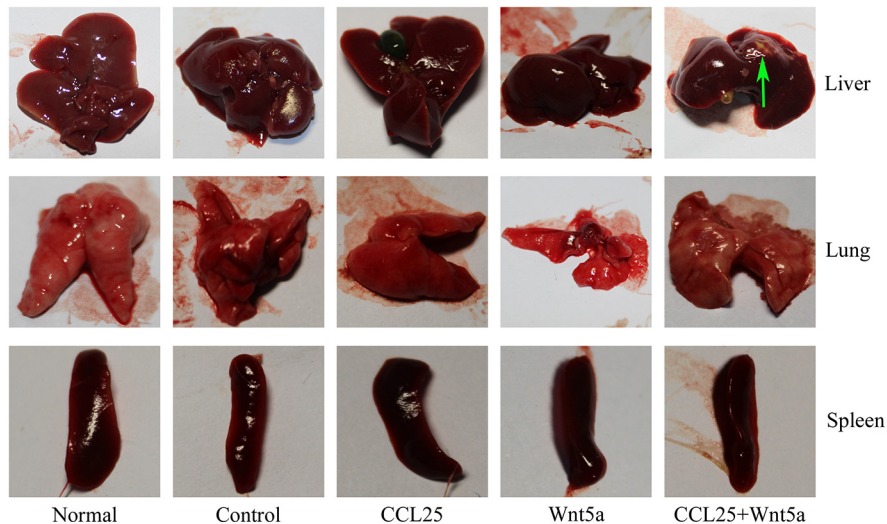

**Supplementary Figure 5: The appearance of liver, lung and spleen of mice.** Morphological observation of mice’s liver, lung and spleen, arrow indicates tumor nodules.

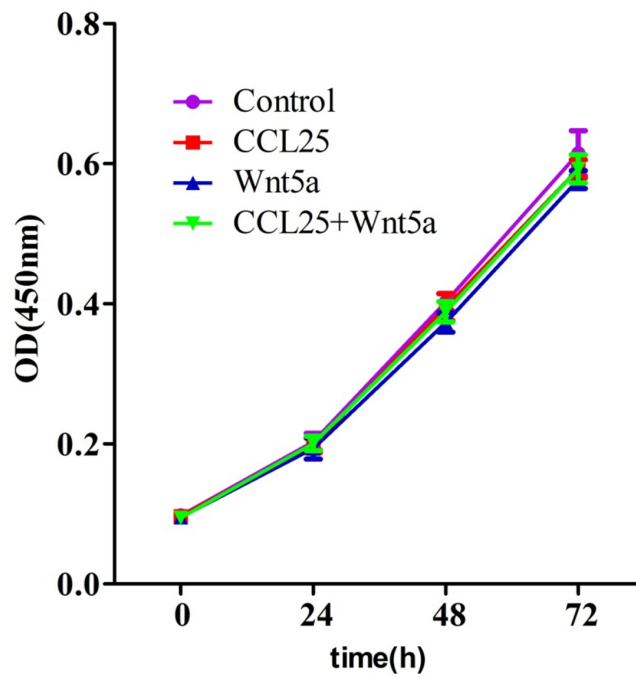

**Supplementary Figure 6: The effects of Wnt5a and CCL25 on MOLT4 cell proliferation *in vitro*.** MOLT4 cells treated with 100ng/ml CCL25 and/or 500ng/ml Wnt5a for indicated times, CCK8 was used to analyze the relative cell numbers at the end of experiment.

**Supplementary Table 1: GSEA Analysis results (20 significant enrichment plots) using Wnt5a high (N=13) vs low (N=40) gene signatures obtained from adult T cell acute lymphocytic leukemia patient data (GSE42328)**

| GO TERM Biological Pathways                             | SIZE | ES   | NES  | NOM p-val | FDR q-val | FWER p-val |
|---------------------------------------------------------|------|------|------|-----------|-----------|------------|
| MONOOXYGENASE_ACTIVITY                                  | 29   | 0.53 | 1.82 | 0.00      | 0.14      | 0.10       |
| REGULATION_OF_RAS_PROTEIN_SIGNAL_TRANSDUCTION           | 19   | 0.72 | 1.76 | 0.00      | 0.22      | 0.26       |
| GUANYL_NUCLEOTIDE_EXCHANGE_FACTOR_ACTIVITY              | 46   | 0.68 | 1.70 | 0.00      | 0.32      | 0.41       |
| RESPONSE_TO_ORGANIC_SUBSTANCE                           | 30   | 0.61 | 1.67 | 0.00      | 0.36      | 0.53       |
| REGULATION_OF_SMALL_GTPASE_MEDIATED_SIGNAL_TRANSDUCTION | 23   | 0.64 | 1.65 | 0.01      | 0.39      | 0.63       |
| AUXILIARY_TRANSPORT_PROTEIN_ACTIVITY                    | 26   | 0.58 | 1.65 | 0.01      | 0.34      | 0.65       |
| LAMELLIPODIUM                                           | 25   | 0.71 | 1.64 | 0.00      | 0.32      | 0.67       |
| REGIONALIZATION                                         | 15   | 0.66 | 1.64 | 0.01      | 0.29      | 0.67       |
| ACTIVATION_OF_NF_KAPPAB_TRANSCRIPTION_FACTOR            | 18   | 0.68 | 1.62 | 0.01      | 0.34      | 0.74       |
| PATTERN_SPECIFICATION_PROCESS                           | 31   | 0.54 | 1.60 | 0.01      | 0.40      | 0.81       |
| ACTIN_CYTOSKELETON_ORGANIZATION_AND_BIOGENESIS          | 105  | 0.51 | 1.59 | 0.00      | 0.37      | 0.81       |
| OXIDOREDUCTASE_ACTIVITY_GO_0016705                      | 35   | 0.55 | 1.59 | 0.02      | 0.35      | 0.81       |
| LIPID_TRANSPORTER_ACTIVITY                              | 28   | 0.64 | 1.57 | 0.01      | 0.43      | 0.87       |
| CHANNEL_REGULATOR_ACTIVITY                              | 24   | 0.53 | 1.56 | 0.02      | 0.46      | 0.89       |
| ACTIN_FILAMENT_ORGANIZATION                             | 24   | 0.69 | 1.55 | 0.01      | 0.46      | 0.91       |
| REGULATION_OF_GTPASE_ACTIVITY                           | 15   | 0.69 | 1.52 | 0.03      | 0.61      | 0.96       |
| GOLGI_ASSOCIATED_VESICLE                                | 28   | 0.61 | 1.52 | 0.02      | 0.60      | 0.96       |
| PHOSPHOINOSITIDE_BINDING                                | 20   | 0.69 | 1.50 | 0.02      | 0.64      | 0.97       |
| CARBOHYDRATE_BIOSYNTHETIC_PROCESS                       | 49   | 0.54 | 1.50 | 0.02      | 0.62      | 0.97       |
| ELECTRON_TRANSPORT_GO_0006118                           | 51   | 0.53 | 1.50 | 0.02      | 0.59      | 0.97       |

Supplementary Table 2: PCR primers

| Gene   | Forward primer(5'-3')     | Reverse primer(5'-3')    |
|--------|---------------------------|--------------------------|
| GAPDH  | CTGGG CTACACTGAGCACC      | AAGTGGTCGTTGAGGGCAATG    |
| Wnt5a  | ATTCTTGGTGGTCGCTAGGTA     | CGCCTTC TCCGATGTAAGTC    |
| Wnt1   | AGGTTCCATCGAATCCTGCAC     | CATCTCGGAGAATACGGTCGT    |
| Wnt2   | CCTGATGAATCTTCACAACAACAGA | TCCCACAGCACATGACTTCACAG  |
| Wnt2b  | TGCTGTACGGTGCAAGGAAT      | AATAGAAGCGGTAGCAGCCC     |
| Wnt3   | CTCGCTGGCTACCCAATTTG      | AGGCTGTCATCTATGGTGGTG    |
| Wnt4   | CTCGTGCCTGCGTTCG          | CCTTGGACGTCTTGTTCAT      |
| Wnt5a  | CTTCGCCCAGGTTGTAATTGAAGC  | CTGCCAAAACAGAGGTGTTATCC  |
| Wnt5b  | GAAGCTGTGCCAATTGTACCAG    | GCTGCCTATCTGCATGACTCTCC  |
| Wnt6   | ATGCTGCCGCCCTTACCC        | CACAGGCAGAGGCTGAGCT      |
| Wnt7a  | TGGGCGCAAGCATCATCTGTAAC   | CATCCACAAAGACCTTGGCGAA   |
| Wnt7b  | TCCTGTACGTGAAGCTCGGA      | TCGGCTTGGTTGTAGTAGCC     |
| Wnt8a  | GCTTGGGAACGCTGGAAGTGC     | CATTGTTTGACCCATCACAGCCAC |
| Wnt8b  | CAGTGCCAATCGGGAGACAGC     | GACAAACTGCTTGGAAATCGCC   |
| Wnt9a  | AAGCGAGGCTTCAAGGAGAC      | CCTTGACGAACTTGCTGCTG     |
| Wnt9b  | GTTTCAGTTCCGGCATGAGC      | CCTGAGGCCACTCTTCACAG     |
| Wnt10a | CACAGTGTGCCTAACATTGCCAG   | CTGCTGAAGATGGGACTCTCATAG |
| Wnt10b | CATCCAGGCACGAATGCGA       | CGGTTGTGGGTATCAATGAAGA   |
| Wnt11  | CCATGGAGCTCTGCTTGTGA      | CTCCTTACACCAGCCTGTGG     |
| Wnt16  | TTCAGACACGAGAGATGGAAC     | CCAGCCTTCACTTGCTGAG      |
